# Supplementary material for: Real-world use of once-weekly semaglutide in patients with type 2 diabetes: pooled analysis of data from four SURE studies by baseline characteristic subgroups
Source: PubMed Central journal article supplement — BMJ Open Diabetes Res Care. 2022 Apr 4;10(2):e002619. doi: 10.1136/bmjdrc-2021-002619 (PMC8984040; doi:10.1136/bmjdrc-2021-002619), 2022-04-04
Supplement: bmjdrc-2021-002619supp001.pdf [file bmjdrc-2021-002619supp001.pdf]

## Supplementary Appendix

### Real-world use of once-weekly semaglutide in patients with type 2 diabetes: pooled analysis of data from four SURE studies by baseline characteristic subgroups

Yale JF et al.

| Contents                                                                                                                | Page no. |
|-------------------------------------------------------------------------------------------------------------------------|----------|
| <b>Supplemental Table 1:</b> Baseline characteristics by baseline BMI                                                   | 2        |
| <b>Supplemental Table 2:</b> Baseline characteristics by age                                                            | 4        |
| <b>Supplemental Table 3:</b> Baseline characteristics by baseline HbA <sub>1c</sub>                                     | 6        |
| <b>Supplemental Table 4:</b> Baseline characteristics by baseline diabetes duration                                     | 9        |
| <b>Supplemental Table 5:</b> Anti-hyperglycemic medication at baseline by baseline BMI                                  | 10       |
| <b>Supplemental Table 6:</b> Anti-hyperglycemic medication at baseline by age at baseline                               | 11       |
| <b>Supplemental Table 7:</b> Anti-hyperglycemic medication at baseline by HbA <sub>1c</sub> at baseline                 | 12       |
| <b>Supplemental Table 8:</b> Anti-hyperglycemic medication at baseline by diabetes duration at baseline                 | 13       |
| <b>Supplemental Table 9:</b> Key inclusion/exclusion criteria in the SUSTAIN trials and SURE studies                    | 14       |
| <b>Supplemental Table 10:</b> Overview of systematically collected safety information in patients receiving semaglutide | 15       |
| <b>Supplemental Table 11:</b> Overview of voluntarily reported adverse events in patients receiving semaglutide         | 16       |

**Supplemental Table 1: Baseline characteristics by baseline BMI**

|                                                  | <25 kg/m <sup>2</sup> | ≥25–<30 kg/m <sup>2</sup> | ≥30–<35 kg/m <sup>2</sup> | ≥35 kg/m <sup>2</sup> |
|--------------------------------------------------|-----------------------|---------------------------|---------------------------|-----------------------|
| <b>N</b>                                         | <b>39</b>             | <b>232</b>                | <b>406</b>                | <b>518</b>            |
| Age, years                                       | 64.0 (9.2)            | 62.0 (10.4)               | 60.5 (10.7)               | 58.6 (11.2)           |
| Female, n (%)                                    | 15 (38.5)             | 83 (35.8)                 | 132 (32.5)                | 239 (46.1)            |
| Race, n (%)                                      |                       |                           |                           |                       |
| White                                            | 29 (74.4)             | 199 (85.8)                | 374 (92.1)                | 484 (93.4)            |
| Asian                                            | 9 (23.1)              | 18 (7.8)                  | 19 (4.7)                  | 15 (2.9)              |
| Black or African American                        | 0                     | 6 (2.6)                   | 3 (0.7)                   | 13 (2.5)              |
| Other                                            | 1 (2.6)               | 9 (3.9)                   | 10 (2.5)                  | 6 (1.2)               |
| Mean baseline HbA <sub>1c</sub> , % (SD)         | 7.9 (1.2)             | 8.2 (1.3)                 | 8.2 (1.5)                 | 8.1 (1.5)             |
| Baseline HbA <sub>1c</sub> <7.0%, n (%)          | 7 (17.9)              | 32 (13.8)                 | 64 (15.8)                 | 123 (23.7)            |
| Fasting plasma glucose, mmol/L <sup>†</sup> (SD) | 9.4 (4.0)             | 8.9 (3.3)                 | 9.1 (2.6)                 | 9.4 (3.5)             |
| Body weight, kg (SD)                             | 68.7 (11.0)           | 82.5 (10.5)               | 96.1 (11.2)               | 116.6 (19.1)          |
| BMI, kg/m <sup>2</sup> (SD)                      | 23.5 (1.4)            | 28.0 (1.4)                | 32.6 (1.4)                | 40.7 (5.4)            |
| Diabetes duration, years (SD) <sup>†</sup>       | 13.6 (6.5)            | 13.4 (7.8)                | 12.7 (7.4)                | 11.2 (8.0)            |
| eGFR, mL/min/1.73 m <sup>2,‡</sup>               | 85.3 (17.8)           | 83.7 (19.5)               | 83.6 (21.7)               | 85.4 (22.5)           |
| Diabetic complications, n (%)                    |                       |                           |                           |                       |
| Diabetic retinopathy <sup>§</sup>                | 4 (10.3)              | 50 (21.6)                 | 71 (17.5)                 | 83 (16.0)             |
| Diabetic neuropathy <sup>†</sup>                 | 5 (12.8)              | 43 (18.5)                 | 66 (16.3)                 | 84 (16.2)             |
| Diabetic nephropathy                             | 4 (10.3)              | 37 (15.9)                 | 66 (16.3)                 | 77 (14.9)             |
| Comorbidities, n (%)                             |                       |                           |                           |                       |
| Dyslipidemia                                     | 22 (56.4)             | 145 (62.5)                | 273 (67.2)                | 303 (58.5)            |
| Hypertension                                     | 21 (53.8)             | 145 (62.5)                | 299 (73.6)                | 372 (71.8)            |
| Coronary heart disease                           | 6 (15.4)              | 45 (19.4)                 | 78 (19.2)                 | 66 (12.7)             |
| Stroke                                           | 2 (5.1)               | 7 (3.0)                   | 16 (3.9)                  | 10 (1.9)              |
| Heart failure                                    | 0                     | 5 (2.2)                   | 14 (3.4)                  | 16 (3.1)              |
| Peripheral vascular disease                      | 0                     | 8 (3.4)                   | 6 (1.5)                   | 12 (2.3)              |
| Prescribed starting dose of semaglutide, n (%)   |                       |                           |                           |                       |
| <0.25 mg                                         | 0                     | 0                         | 0                         | 2 (0.4)               |
| 0.25 mg                                          | 30 (76.9)             | 177 (76.3)                | 304 (74.9)                | 413 (79.7)            |
| 0.5 mg                                           | 7 (17.9)              | 41 (17.7)                 | 66 (16.3)                 | 74 (14.3)             |
| 1.0 mg                                           | 2 (5.1)               | 14 (6.0)                  | 36 (8.9)                  | 29 (5.6)              |

|                                                     |           |            |            |            |
|-----------------------------------------------------|-----------|------------|------------|------------|
| Reasons to initiate semaglutide, n (%) <sup>¶</sup> |           |            |            |            |
| Improve glycemic control                            | 33 (84.6) | 200 (86.2) | 347 (85.5) | 427 (82.4) |
| Weight reduction                                    | 12 (30.8) | 125 (53.9) | 317 (78.1) | 452 (87.3) |
| Issues with hypoglycemia                            | 2 (5.1)   | 17 (7.3)   | 20 (4.9)   | 18 (3.5)   |
| Address CV risk                                     | 12 (30.8) | 49 (21.1)  | 111 (27.3) | 123 (23.7) |
| Simplify regimen                                    | 12 (30.8) | 87 (37.5)  | 119 (29.3) | 115 (22.2) |
| Convenience                                         | 8 (20.5)  | 48 (20.7)  | 83 (20.4)  | 93 (18.0)  |
| Other                                               | 2 (5.1)   | 7 (3.0)    | 11 (2.7)   | 23 (4.4)   |
| Missing                                             | 0         | 0          | 0          | 1 (0.2)    |

N=39, 232, 406 and 518 for <25, ≥25–<30, ≥30–<35 and ≥35, respectively, unless otherwise indicated; \*n=16, n=116, n=185, n=253;

<sup>†</sup>n=39, n=231, n=406, n=517; <sup>‡</sup>n=25, n=175, n=304, n=397; <sup>§</sup>n=39, n=232, n=406, n=517; <sup>¶</sup>n=39, n=232, n=405, n=518. <sup>¶</sup>More than one reason could be selected for initiating semaglutide. Data, which are based on the full analysis set, are mean (SD) or number (proportion) of patients. BMI, body mass index; CV, cardiovascular; eGFR, estimated glomerular filtration rate; SD, standard deviation.

**Supplemental Table 2: Baseline characteristics by age**

|                                                  | <b>&lt;65 years</b> | <b>≥65 years</b> |
|--------------------------------------------------|---------------------|------------------|
| <b>N</b>                                         | <b>785</b>          | <b>427</b>       |
| Age, years                                       | 54.0 (8.1)          | 71.3 (4.8)       |
| Female, n (%)                                    | 323 (41.1)          | 150 (35.1)       |
| Race, n (%)                                      |                     |                  |
| White                                            | 693 (88.3)          | 410 (96.0)       |
| Asian                                            | 50 (6.4)            | 11 (2.6)         |
| Black or African American                        | 21 (2.7)            | 1 (0.2)          |
| Other                                            | 21 (2.7)            | 5 (1.2)          |
| Baseline HbA <sub>1c</sub> , %                   | 8.3 (1.6)           | 7.9 (1.3)        |
| Baseline HbA <sub>1c</sub> <7.0%, n (%)          | 142 (18.1)          | 89 (20.8)        |
| Fasting plasma glucose, mmol/L*                  | 9.3 (3.4)           | 9.0 (2.8)        |
| Body weight, kg <sup>†</sup>                     | 103.6 (21.7)        | 97.6 (19.0)      |
| BMI, kg/m <sup>2‡</sup>                          | 35.5 (6.9)          | 33.8 (5.9)       |
| Diabetes duration, years <sup>§</sup>            | 10.9 (7.2)          | 14.7 (8.2)       |
| eGFR, mL/min/1.73 m <sup>2</sup> , <sup>  </sup> | 92.2 (18.9)         | 70.2 (18.9)      |
| Diabetic complications, n (%)                    |                     |                  |
| Diabetic retinopathy <sup>  </sup>               | 124 (15.8)          | 86 (20.2)        |
| Diabetic neuropathy                              | 113 (14.4)          | 87 (20.4)        |
| Diabetic nephropathy                             | 92 (11.7)           | 92 (21.5)        |
| Comorbidities, n (%)                             |                     |                  |
| Dyslipidemia                                     | 456 (58.1)          | 298 (69.8)       |
| Hypertension                                     | 505 (64.3)          | 341 (79.9)       |
| Coronary heart disease                           | 96 (12.2)           | 101 (23.7)       |
| Stroke                                           | 17 (2.2)            | 19 (4.4)         |
| Heart failure                                    | 17 (2.2)            | 18 (4.2)         |
| Peripheral vascular disease                      | 15 (1.9)            | 11 (2.6)         |
| Prescribed starting dose of semaglutide, n (%)   |                     |                  |
| <0.25 mg                                         | 2 (0.3)             | 0                |
| 0.25 mg                                          | 602 (76.7)          | 335 (78.5)       |
| 0.5 mg                                           | 123 (15.7)          | 68 (15.9)        |
| 1.0 mg                                           | 58 (7.4)            | 24 (5.6)         |
| Reasons to initiate semaglutide                  |                     |                  |

|                                               |            |            |
|-----------------------------------------------|------------|------------|
| treatment, n (%) <sup>¶</sup>                 |            |            |
| Improve glycemic control                      | 674 (85.9) | 346 (81.0) |
| Weight reduction                              | 616 (78.5) | 300 (70.3) |
| Issues with hypoglycemia on current treatment | 31 (3.9)   | 26 (6.1)   |
| Address CV risk factors                       | 187 (23.8) | 113 (26.5) |
| Simplify current treatment regimen            | 207 (26.4) | 130 (30.4) |
| Convenience                                   | 162 (20.6) | 73 (17.1)  |
| Other                                         | 30 (3.8)   | 14 (3.3)   |
| Missing                                       | 0          | 1 (0.2)    |

N=785 and 427 for <65 and ≥65, respectively, unless otherwise indicated; \*n=375, n=199; †n=779, n=422; ‡n=775, n=420; §n=590, n=323; ¶n=784, n=426; ¶¶n=783, n=427 ¶¶¶More than one reason could be selected for initiating semaglutide. Data, which are based here for the full analysis set, are mean (SD) or number (proportion) of patients. CV, cardiovascular; eGFR, estimated glomerular filtration rate; SD, standard deviation.

**Supplemental Table 3: Baseline characteristics by baseline HbA<sub>1c</sub>**

|                                         | <7%          | ≥7–≤8%       | >8%–≤9%     | >9%          |
|-----------------------------------------|--------------|--------------|-------------|--------------|
| <b>N</b>                                | <b>231</b>   | <b>414</b>   | <b>305</b>  | <b>262</b>   |
| Age, years                              | 60.7 (11.2)  | 61.0 (11.0)  | 60.5 (10.0) | 57.5 (11.3)  |
| Female, n (%)                           | 95 (41.1)    | 165 (39.9)   | 116 (38.0)  | 97 (37.0)    |
| Race, n (%)                             |              |              |             |              |
| White                                   | 216 (93.5)   | 375 (90.6)   | 281 (92.1)  | 231 (88.2)   |
| Asian                                   | 8 (3.5)      | 24 (5.8)     | 10 (3.3)    | 19 (7.3)     |
| Black or African American               | 3 (1.3)      | 8 (1.9)      | 4 (1.3)     | 7 (2.7)      |
| Other                                   | 4 (1.7)      | 7 (1.7)      | 10 (3.3)    | 5 (1.9)      |
| Baseline HbA <sub>1c</sub> , %          | 6.4 (0.5)    | 7.5 (0.3)    | 8.4 (0.3)   | 10.3 (1.2)   |
| Baseline HbA <sub>1c</sub> <7.0%, n (%) | 231 (100.0)  | 0            | 0           | 0            |
| Fasting plasma glucose, mmol/L*         | 7.1 (1.7)    | 8.4 (2.0)    | 9.6 (2.4)   | 13.0 (4.2)   |
| Body weight, kg <sup>†</sup>            | 104.4 (21.8) | 100.3 (19.8) | 98.8 (19.7) | 103.9 (22.9) |
| BMI, kg/m <sup>2‡</sup>                 | 36.3 (6.9)   | 34.5 (6.4)   | 33.9 (5.9)  | 35.4 (7.2)   |
| Diabetes duration, years <sup>§</sup>   | 11.0 (8.3)   | 12.7 (8.1)   | 13.1 (7.4)  | 11.6 (7.0)   |
| eGFR, mL/min/1.73 m <sup>2  </sup>      | 82.0 (20.0)  | 83.5 (22.2)  | 86.2 (20.3) | 85.9 (23.3)  |
| Diabetic complications, n (%)           |              |              |             |              |
| Diabetic retinopathy <sup>¶</sup>       | 24 (10.5)    | 67 (16.2)    | 60 (19.7)   | 59 (22.5)    |
| Diabetic neuropathy <sup>¶</sup>        | 36 (15.7)    | 73 (17.6)    | 48 (15.7)   | 43 (16.5)    |
| Diabetic nephropathy                    | 33 (14.3)    | 69 (16.7)    | 44 (14.4)   | 38 (14.5)    |
| Comorbidities, n (%)                    |              |              |             |              |
| Dyslipidemia                            | 135 (58.4)   | 269 (65.0)   | 200 (65.6)  | 150 (57.3)   |
| Hypertension                            | 167 (72.3)   | 300 (72.5)   | 210 (68.9)  | 169 (64.5)   |
| Hypertension                            | 45 (19.5)    | 61 (14.7)    | 48 (15.7)   | 43 (16.4)    |

|                                                               |            |            |            |            |
|---------------------------------------------------------------|------------|------------|------------|------------|
| Coronary heart disease                                        | 2 (0.9)    | 11 (2.7)   | 12 (3.9)   | 11 (4.2)   |
| Stroke                                                        | 5 (2.2)    | 11 (2.7)   | 10 (3.3)   | 9 (3.4)    |
| Heart failure                                                 | 6 (2.6)    | 7 (1.7)    | 5 (1.6)    | 8 (3.1)    |
| Peripheral vascular disease                                   |            |            |            |            |
| Prescribed starting dose of semaglutide, n (%)                |            |            |            |            |
| <0.25 mg                                                      | 1 (0.4)    | 0          | 1 (0.3)    | 0          |
| 0.25 mg                                                       | 160 (69.3) | 309 (74.6) | 241 (79.0) | 227 (86.6) |
| 0.5 mg                                                        | 48 (20.8)  | 74 (17.9)  | 45 (14.8)  | 24 (9.2)   |
| 1.0 mg                                                        | 22 (9.5)   | 31 (7.5)   | 18 (5.9)   | 11 (4.2)   |
| Reasons to initiate semaglutide treatment, n (%) <sup>¶</sup> |            |            |            |            |
| Improve glycemic control                                      | 107 (46.3) | 368 (88.9) | 292 (95.7) | 253 (96.6) |
| Weight reduction                                              | 188 (81.4) | 315 (76.1) | 225 (73.8) | 188 (71.8) |
| Issues with hypoglycemia                                      | 6 (2.6)    | 28 (6.8)   | 11 (3.6)   | 12 (4.6)   |
| Address CV risk factors                                       | 52 (22.5)  | 96 (23.2)  | 75 (24.6)  | 77 (29.4)  |
| Simplify current regimen                                      | 77 (33.3)  | 130 (31.4) | 73 (23.9)  | 57 (21.8)  |
| Convenience                                                   | 45 (19.5)  | 84 (20.3)  | 52 (17.0)  | 54 (20.6)  |
| Other                                                         | 12 (5.2)   | 13 (3.1)   | 6 (2.0)    | 13 (5.0)   |
| Missing                                                       | 0          | 0          | 0          | 1 (0.4)    |

N=231, 414, 305 and 262 for <7%, ≥7%-≤-8%, >8%-≤-9%, >9%, respectively, unless otherwise indicated; \*n=124, n=206, n=146, n=98; <sup>†</sup>n=228, n=409, n=304, n=260; <sup>‡</sup>n=226, n=407, n=303, n=259; <sup>§</sup>n=231, n=412, n=305, n=262; <sup>||</sup>n=174, n=308, n=227, n=204; <sup>¶</sup>n=229, n=414, n=305, n=262 for diabetic retinopathy and n=230, n=414, n=305, n=261 for diabetic neuropathy. <sup>¶</sup>More than one

reason could be selected for initiating semaglutide. Data, which are based on the full analysis set, are mean (SD) or number (proportion) of patients. BMI, body mass index; eGFR, estimated glomerular filtration rate; SD, standard deviation.



**Supplemental Table 4: Baseline characteristics by baseline diabetes duration**

|                                                                | <b>&lt;5 years</b> | <b>≥5–&lt;10 years</b> | <b>≥10 years</b> |
|----------------------------------------------------------------|--------------------|------------------------|------------------|
| <b>N (FAS)</b>                                                 | <b>235</b>         | <b>304</b>             | <b>671</b>       |
| Age, years                                                     | 53.6 (12.4)        | 59.5 (9.8)             | 62.6 (9.9)       |
| Female, n (%)                                                  | 84 (35.7)          | 121 (39.8)             | 267 (39.8)       |
| Race, n (%)                                                    |                    |                        |                  |
| White                                                          | 213 (90.6)         | 281 (92.4)             | 607 (90.5)       |
| Asian                                                          | 15 (6.4)           | 10 (3.3)               | 36 (5.4)         |
| Black or African American                                      | 5 (2.1)            | 5 (1.6)                | 12 (1.8)         |
| Other                                                          | 2 (0.9)            | 8 (2.6)                | 16 (2.4)         |
| Baseline HbA <sub>1c</sub> , %                                 | 7.9 (1.6)          | 8.2 (1.5)              | 8.2 (1.4)        |
| Baseline HbA <sub>1c</sub> <7.0%, n (%)                        | 69 (29.4)          | 49 (16.1)              | 113 (16.8)       |
| Fasting plasma glucose, mmol/L*                                | 9.0 (3.2)          | 9.2 (3.0)              | 9.3 (3.3)        |
| Body weight, kg <sup>†</sup>                                   | 110.6 (23.4)       | 101.7 (21.7)           | 98.2 (18.7)      |
| BMI, kg/m <sup>2‡</sup>                                        | 37.1 (7.4)         | 34.8 (6.8)             | 34.2 (6.0)       |
| Diabetes duration, years                                       | 2.8 (1.4)          | 7.6 (1.5)              | 17.6 (6.1)       |
| eGFR, mL/min/1.73 m <sup>2§</sup>                              | 93.0 (20.8)        | 85.8 (19.6)            | 80.8 (21.9)      |
| Diabetic complications, n (%) <sup>  </sup>                    |                    |                        |                  |
| Diabetic retinopathy                                           | 13 (5.5)           | 36 (11.8)              | 161 (24.1)       |
| Diabetic neuropathy                                            | 18 (7.7)           | 34 (11.2)              | 147 (22.0)       |
| Diabetic nephropathy                                           | 18 (7.7)           | 29 (9.5)               | 137 (20.4)       |
| Comorbidities, n (%)                                           |                    |                        |                  |
| Dyslipidemia                                                   | 118 (50.2)         | 178 (58.6)             | 457 (68.1)       |
| Hypertension                                                   | 145 (61.7)         | 204 (67.1)             | 495 (73.8)       |
| Coronary heart disease                                         | 25 (10.6)          | 44 (14.5)              | 128 (19.1)       |
| Stroke                                                         | 5 (2.1)            | 8 (2.6)                | 23 (3.4)         |
| Heart failure                                                  | 7 (3.0)            | 6 (2.0)                | 22 (3.3)         |
| Peripheral vascular disease                                    | 3 (1.3)            | 3 (1.0)                | 20 (3.0)         |
| Prescribed starting dose of semaglutide, n (%)                 |                    |                        |                  |
| <0.25 mg                                                       | 0                  | 1 (0.3)                | 1 (0.1)          |
| 0.25 mg                                                        | 197 (83.8)         | 239 (78.6)             | 501 (74.7)       |
| 0.5 mg                                                         | 27 (11.5)          | 47 (15.5)              | 117 (17.4)       |
| 1.0 mg                                                         | 11 (4.7)           | 17 (5.6)               | 52 (7.7)         |
| Reasons to initiate semaglutide treatment, n (%) <sup>  </sup> |                    |                        |                  |
| Improve glycemic control                                       | 188 (80.0)         | 258 (84.9)             | 573 (85.4)       |
| Weight reduction                                               | 196 (83.4)         | 223 (73.4)             | 497 (74.1)       |
| Issues with hypoglycemia on current treatment                  | 5 (2.1)            | 15 (4.9)               | 37 (5.5)         |
| Address CV risk factors                                        | 56 (23.8)          | 70 (23.0)              | 174 (25.9)       |
| Simplify current treatment regimen                             | 46 (19.6)          | 79 (26.0)              | 211 (31.4)       |
| Convenience                                                    | 32 (13.6)          | 59 (19.4)              | 144 (21.5)       |
| Other                                                          | 11 (4.7)           | 9 (3.0)                | 24 (3.6)         |
| Missing                                                        | 0                  | 1 (0.3)                | 0                |

N=235, 304, and 671 and 262 for <5, ≥5–<10 and ≥10 years, respectively, unless otherwise indicated; \*n=130, n=140, n=304; †n=232, n=302, n=665; ‡n=231, n=300, n=662; §n=180, n=227, n=505; ||n=235, n=304, n=669. ||More than one reason could be selected for initiating semaglutide. Data, which are based on the full analysis set, are mean (SD) or number (proportion) of patients. BMI, body mass index; eGFR, estimated glomerular filtration rate; FAS, full analysis set; SD, standard deviation.

**Supplemental Table 5:** Anti-hyperglycemic medication at baseline by baseline BMI

| <b>N (%)</b>                                        | <b>&lt;25<br/>kg/m<sup>2</sup></b> | <b>≥25–&lt;30<br/>kg/m<sup>2</sup></b> | <b>≥30–&lt;35<br/>kg/m<sup>2</sup></b> | <b>≥35<br/>kg/m<sup>2</sup></b> |
|-----------------------------------------------------|------------------------------------|----------------------------------------|----------------------------------------|---------------------------------|
| <b>N</b>                                            | <b>39</b>                          | <b>232</b>                             | <b>406</b>                             | <b>518</b>                      |
| Metformin                                           | 32 (82.1)                          | 177 (76.3)                             | 317 (78.1)                             | 405 (78.2)                      |
| Sulfonylureas                                       | 4 (10.3)                           | 45 (19.4)                              | 83 (20.4)                              | 94 (18.1)                       |
| Alpha-glucosidase inhibitors                        | 0                                  | 0                                      | 2 (0.5)                                | 3 (0.6)                         |
| Thiazolidinediones                                  | 0                                  | 5 (2.2)                                | 16 (3.9)                               | 18 (3.5)                        |
| DPP-4 inhibitors                                    | 5 (12.8)                           | 55 (23.7)                              | 78 (19.2)                              | 62 (12.0)                       |
| SGLT-2 inhibitors                                   | 18 (46.2)                          | 106 (45.7)                             | 186 (45.8)                             | 182 (35.1)                      |
| Other anti-hyperglycemic drugs<br>excluding insulin | 0                                  | 7 (3.0)                                | 7 (1.7)                                | 2 (0.4)                         |
| Other GLP-1RA                                       | 3 (7.7)                            | 40 (17.2)                              | 99 (24.4)                              | 108 (20.8)                      |
| Basal insulin                                       | 13 (33.3)                          | 88 (37.9)                              | 139 (34.2)                             | 178 (34.4)                      |
| Premixed insulin                                    | 1 (2.6)                            | 10 (4.3)                               | 9 (2.2)                                | 34 (6.6)                        |
| Fast-acting insulin                                 | 3 (7.7)                            | 31 (13.4)                              | 44 (10.8)                              | 90 (17.4)                       |
| No medication                                       | 0                                  | 2 (0.9)                                | 9 (2.2)                                | 12 (2.3)                        |
| Oral anti-hyperglycemic drug only                   | 23 (59.0)                          | 112 (48.3)                             | 198 (48.8)                             | 235 (45.4)                      |

Data are based on the full analysis set. DPP-4, dipeptidyl peptidase-4; GLP-1RA, glucagon-like peptide-1 receptor agonist; SGLT-2, sodium–glucose cotransporter-2.

**Supplemental Table 6:** Anti-hyperglycemic medication at baseline by age at baseline

| <b>N (%)</b>                                     | <b>&lt;65 years</b> | <b>≥65 years</b> |
|--------------------------------------------------|---------------------|------------------|
| <b>N</b>                                         | <b>785</b>          | <b>427</b>       |
| Metformin                                        | 614 (78.2)          | 327 (76.6)       |
| Sulfonylureas                                    | 136 (17.3)          | 92 (21.5)        |
| Alpha-glucosidase inhibitors                     | 3 (0.4)             | 2 (0.5)          |
| Thiazolidinediones                               | 30 (3.8)            | 9 (2.1)          |
| DPP-4 inhibitors                                 | 119 (15.2)          | 82 (19.2)        |
| SGLT-2 inhibitors                                | 347 (44.2)          | 152 (35.6)       |
| Other anti-hyperglycemic drugs excluding insulin | 10 (1.3)            | 6 (1.4)          |
| Other GLP-1RA                                    | 168 (21.4)          | 84 (19.7)        |
| Basal insulin                                    | 268 (34.1)          | 153 (35.8)       |
| Premixed insulin                                 | 29 (3.7)            | 26 (6.1)         |
| Fast-acting insulin                              | 109 (13.9)          | 61 (14.3)        |
| No medication                                    | 16 (2.0)            | 10 (2.3)         |
| Oral anti-hyperglycemic drug only                | 377 (48.0)          | 199 (46.6)       |
| GLP-1RA switch                                   | 168 (21.4)          | 84 (19.7)        |

Data are based on the full analysis set. DPP-4, dipeptidyl peptidase-4; GLP-1RA, glucagon-like peptide-1 receptor agonist; SGLT-2, sodium–glucose cotransporter-2.

**Supplemental Table 7:** Anti-hyperglycemic medication at baseline by HbA<sub>1c</sub> at baseline

| <b>N (%)</b>                                     | <b>&lt;7%</b> | <b>≥7% to ≤8%</b> | <b>&gt;8%-≤9%</b> | <b>&gt;9%</b> |
|--------------------------------------------------|---------------|-------------------|-------------------|---------------|
| <b>N</b>                                         | <b>231</b>    | <b>414</b>        | <b>305</b>        | <b>262</b>    |
| Metformin                                        | 182 (78.8)    | 319 (77.1)        | 242 (79.3)        | 198 (75.6)    |
| Sulfonylureas                                    | 28 (12.1)     | 73 (17.6)         | 69 (22.6)         | 58 (22.1)     |
| Alpha-glucosidase inhibitors                     | 1 (0.4)       | 2 (0.5)           | 1 (0.3)           | 1 (0.4)       |
| Thiazolidinediones                               | 6 (2.6)       | 11 (2.7)          | 15 (4.9)          | 7 (2.7)       |
| DPP-4 inhibitors                                 | 17 (7.4)      | 74 (17.9)         | 58 (19.0)         | 52 (19.8)     |
| SGLT-2 inhibitors                                | 71 (30.7)     | 189 (45.7)        | 135 (44.3)        | 104 (39.7)    |
| Other anti-hyperglycemic drugs excluding insulin | 1 (0.4)       | 7 (1.7)           | 6 (2.0)           | 2 (0.8)       |
| Other GLP-1RA                                    | 59 (25.5)     | 97 (23.4)         | 61 (20.0)         | 35 (13.4)     |
| Basal insulin                                    | 72 (31.2)     | 140 (33.8)        | 127 (41.6)        | 82 (31.3)     |
| Premixed insulin                                 | 6 (2.6)       | 14 (3.4)          | 13 (4.3)          | 22 (8.4)      |
| Fast-acting insulin                              | 19 (8.2)      | 60 (14.5)         | 47 (15.4)         | 44 (16.8)     |
| No medication                                    | 12 (5.2)      | 6 (1.4)           | 5 (1.6)           | 3 (1.1)       |
| Oral anti-hyperglycemic drug only                | 107 (46.3)    | 204 (49.3)        | 134 (43.9)        | 131 (50.0)    |

Data are based on the full analysis set. DPP-4, dipeptidyl peptidase-4; GLP-1RA, glucagon-like peptide-1 receptor agonist; SGLT-2, sodium-glucose cotransporter-2.

**Supplemental Table 8:** Anti-hyperglycemic medication at baseline by diabetes duration at baseline

| <b>N (%)</b>                                     | <b>&lt;5 years</b> | <b>≥5-&lt;10 years</b> | <b>≥10 years</b> |
|--------------------------------------------------|--------------------|------------------------|------------------|
| <b>N</b>                                         | <b>235</b>         | <b>304</b>             | <b>671</b>       |
| Metformin                                        | 181 (77.0)         | 238 (78.3)             | 520 (77.5)       |
| Sulfonylureas                                    | 23 (9.8)           | 56 (18.4)              | 148 (22.1)       |
| Alpha-glucosidase inhibitors                     | 0                  | 1 (0.3)                | 4 (0.6)          |
| Thiazolidinediones                               | 2 (0.9)            | 10 (3.3)               | 27 (4.0)         |
| DPP-4 inhibitors                                 | 26 (11.1)          | 59 (19.4)              | 116 (17.3)       |
| SGLT-2 inhibitors                                | 63 (26.8)          | 129 (42.4)             | 306 (45.6)       |
| Other anti-hyperglycemic drugs excluding insulin | 1 (0.4)            | 4 (1.3)                | 11 (1.6)         |
| Other GLP-1RA                                    | 32 (13.6)          | 60 (19.7)              | 159 (23.7)       |
| Basal insulin                                    | 36 (15.3)          | 70 (23.0)              | 315 (46.9)       |
| Premixed insulin                                 | 6 (2.6)            | 15 (4.9)               | 34 (5.1)         |
| Fast-acting insulin                              | 10 (4.3)           | 20 (6.6)               | 140 (20.9)       |
| No medication                                    | 14 (6.0)           | 2 (0.7)                | 10 (1.5)         |
| Oral anti-hyperglycemic drug only                | 154 (65.5)         | 181 (59.5)             | 240 (35.8)       |

Data are based on the full analysis set. DPP-4, dipeptidyl peptidase-4; GLP-1RA, glucagon-like peptide-1 receptor agonist; SGLT-2, sodium-glucose cotransporter-2.

**Supplemental Table 9:** Key inclusion/exclusion criteria in the SUSTAIN trials and SURE studies

| <b>SUSTAIN trials (11-19)</b>                                                                                                                                                                                                                                                          | <b>SURE studies</b>                                                                                                                                                                                                                                                                 |
|----------------------------------------------------------------------------------------------------------------------------------------------------------------------------------------------------------------------------------------------------------------------------------------|-------------------------------------------------------------------------------------------------------------------------------------------------------------------------------------------------------------------------------------------------------------------------------------|
| <ul style="list-style-type: none"><li>• Age 18 years (or at least 20 years for trials conducted in Japan)</li><li>• Diagnosed with type 2 diabetes with a baseline HbA<sub>1c</sub> <math>\geq</math>7.0 or <math>\geq</math>7.5% with an upper limit of 10.0, 10.5 or 11.0%</li></ul> | <ul style="list-style-type: none"><li>• Age <math>\geq</math>18 years at the time of signing the informed consent</li><li>• Diagnosed with type 2 diabetes at least 12 weeks prior to inclusion</li><li>• No upper or lower limit for HbA<sub>1c</sub> or body mass index</li></ul> |

**Supplemental Table 10:** Overview of systematically collected safety information in patients receiving semaglutide

| <b>Total N=1,212 (FAS)</b>                 | <b>Number of patients,<br/>n (%)</b> | <b>Events</b> |
|--------------------------------------------|--------------------------------------|---------------|
| Serious ADRs                               | 11 (0.9)                             | 18            |
| Fatal events                               | 3 (0.2)                              | 3             |
| Pregnancies                                | 0                                    | 0             |
| AEs in fetus/newborns                      | 0                                    | 0             |
| Severe or documented hypoglycemic episodes | 57 (4.70)                            | 198           |

Data are based on the full analysis set. Fatal events were due to 1) sepsis; 2) pancreatic carcinoma; and 3) sudden death in a patient with pre-existing hypertension, atrial fibrillation and myocardial infarction. In all three cases, the events were judged as unlikely to be related to semaglutide treatment by the treating physician. %, percentage of subjects experiencing at least one event; ADR, adverse drug reaction; AE, adverse event; EAS, effectiveness analysis set; FAS, full analysis set; n, number of subjects experiencing at least one event.

**Supplemental Table 11:** Overview of voluntarily reported adverse events in patients receiving semaglutide

| <b>Total N=1,212 (FAS)</b>                         | <b>Number of patients,<br/>n (%)</b> | <b>Events</b> |
|----------------------------------------------------|--------------------------------------|---------------|
| All AEs                                            | 170 (14.0)                           | 297           |
| Severity of AEs                                    |                                      |               |
| Mild                                               | 109 (9.0)                            | 175           |
| Moderate                                           | 65 (5.4)                             | 94            |
| Severe                                             | 21 (1.7)                             | 28            |
| AEs leading to premature treatment discontinuation | 44 (3.6)                             | 74            |
| Gastrointestinal AEs                               | 108 (8.9)                            | 166           |

Data are based on the full analysis set. %, percentage of subjects experiencing at least one event; AE, adverse event; FAS, full analysis set; n, number of subjects experiencing at least one event.
